# Supplementary material for: Sea-surface reflection-aided underwater localization with unknown sound speed
Source: Springer Nature journal article supplement (doi:10.1007/s11432-018-9625-y), 2019-02-20
Supplement: 11432_2018_9625_MOESM1_ESM.pdf [file 11432_2018_9625_MOESM1_ESM.pdf]

# Sea-surface Reflection-aided Underwater Localization with Unknown Sound Speed

Bingbing ZHANG<sup>1\*</sup>, Yongchang HU<sup>2</sup>, Hongyi WANG<sup>1</sup> & Zhaowen ZHUANG<sup>1</sup>

<sup>1</sup>School of Electronic Science, National University of Defense Technology, Changsha 410073, China;  
<sup>2</sup>Xi'an Research Center, Cloud Core Network Product Line/R&D Mgmt, Huawei Technologies Co., Ltd, Xian 710072, China

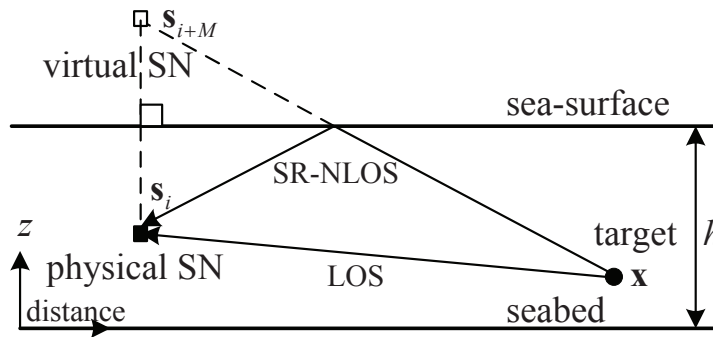

Figure 1 Illustration of the SN-target geometry in the  $z$ -distance plane.

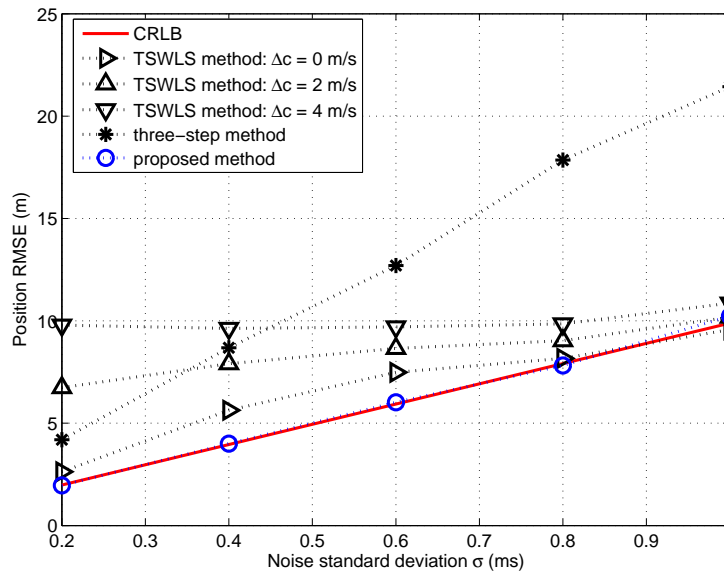

Figure 2 Comparison of the localization RMSE performance versus measurement noise standard deviation  $\sigma$ .

\* Corresponding author (email: zbbzb@nudt.edu.cn.com)

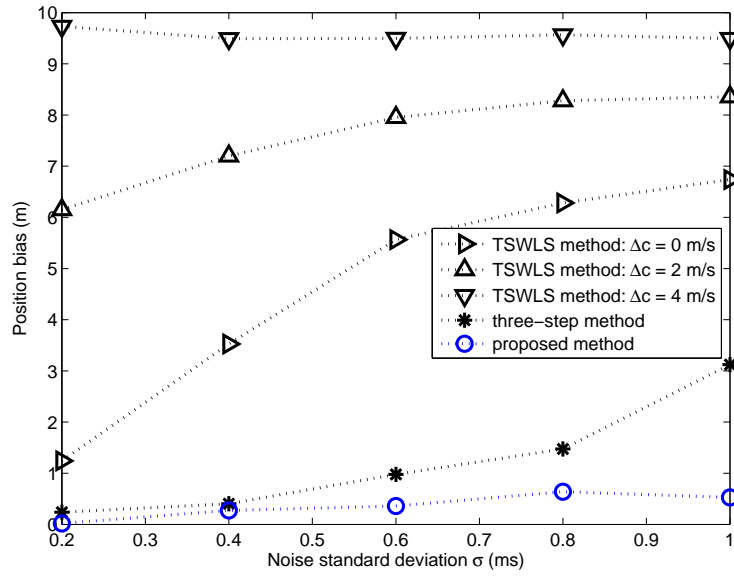

**Figure 3** Comparison of the localization bias performance versus measurement noise standard deviation  $\sigma$ .

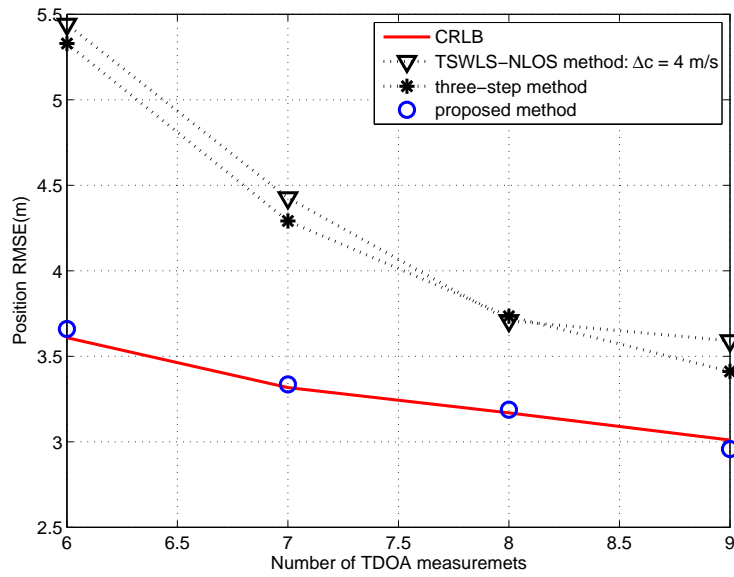

**Figure 4** Comparison of the localization RMSE performance versus the number of TDOA measurements.
